# Supplementary material for: Contamination and remediation of contaminated firing ranges—an overview
Source: Frontiers journal article supplement (doi:10.3389/fenvs.2024.1352603), 2024-03-12
Supplement: Data_Sheet_1.docx [file Data_Sheet_1.docx]

Supplementary Material

Contamination and remediation of contaminated firing ranges – An Overview

**Yining Zhu a,b,c †, Ruijie Che a,b,c †, Biyang Tu a,b,c, Xinya Lu a,b,c, Jining Li a,b,c, Yongbing Zhu d, Fenghe Wang a,b,c⁎**

*** Correspondence:** Corresponding Author: wangfenghe@njust.edu.cn (Fenghe Wang)

# Supplementary Texts

To investigate the topic of shooting range remediation, a comprehensive search was conducted on the Web of Science Core Collection utilizing the keywords "Shooting range" and "Remediation". The search was limited to the time period between January 1, 2001, and December 31, 2023, yielding a total of 266 search results.

## Analysis of issuing countries

By utilizing Citespace software to conduct an analysis on the issuing countries of the 266 documents screened within the WOS literature library, Table S1 reveals the top five nations with the greatest number of publications in the aforementioned field. Notably, China emerges as the frontrunner, having contributed 75 pertinent literature pieces concerning pollution remediation of target range sites. Furthermore, China exhibits a significant mediational centrality value of 0.33 within the network of countries, suggesting a stronger interconnectedness between its research and other nations. Figure. S1 (a) presents a visualization of the measurement statistics pertaining to the countries and regions included in the study, revealing China's prominent position as the global frontrunner in this domain. The calculation results indicate a total of 62 participating countries and regions, with 86 connecting lines generated, suggesting a higher level of interconnectedness among nations in research within this field. In Figure. S1 (b), the temporal evolution of China's scholarly output in this area is depicted, spanning from 2001 to the present. Since 2016, there has been a significant increase in the amount of literature in this field, and our research in this field is still in a phase of continuous development and exploration.

## Analysis of issuing organizations

A visual examination of the institutions that have published papers pertaining to target range contaminated site remediation indicates the presence of 229 pertinent institutions in this field. These institutions collectively exhibit 173 connections between their nodes, resulting in a density value of 0.066 (Figure. S2). Notably, the Chinese Academy of Sciences leads the pack with 17 publications, followed by Kangwon National University (14 publications), Newcastle University (9 publications), Gifu University (8 publications), and Hong Kong Polytechnic University (8 publications) (Table S2). The Chinese Academy of Sciences (CAS) initiated its research in this domain in 2008, thereby highlighting China's prominent role in the field of target range site rehabilitation. The Hong Kong Polytechnic University exhibits a notable centrality in mapping, denoting its substantial publication output and influential articles within the field. Moreover, a collaborative network has been established among various institutions, with certain institutions displaying a strong interconnection due to their extensive publication contributions, thereby facilitating further research endeavors.

## Analysis of authors of publications

The Citespace software was employed to visually represent and analyze the authors of publications within the domain of target range pollution remediation. Consequently, a visualization map illustrating author collaborations was generated (Figure. S3). A total of 267 authors have contributed to published articles in this particular field. Notably, Yong Sik, Lee Sang Soo, and Ahmad Mahtab emerge as the three researchers with a publication count of ≥ 10, positioning them at the core of the field with significant influence. A total of 160 connections were generated between individual researchers, with a density of 0.0045. Authors with a high number of publications generated a certain amount of collaboration between them, but most of the researcher groups collaborated less with each other, and only intra-research group connections existed.

## Keyword Cluster Analysis

Cluster analysis of the keywords classified the search field keywords into 11 clusters such as #0 phytoremediation, #1 arbuscular mycorrhizal fungi, #2 shooting range soil, #3 contaminated soil, #4 soil contamination and so on. Cluster. The smaller the cluster number, the more keywords are included in the cluster. It is shown that phytoremediation is one of the more dominant classes of remediation in range contaminated site remediation studies. The links between the keyword modules are relatively strong. The results of the cluster analysis of the keywords show that the module value Q of the clusters is 0.5237, and the weighted average module value S is 0.8435, which indicates that the results of the cluster analysis are more credible and have certain reference value.

The top ten keyword clusters in the cluster analysis results were selected for timeline analysis (Figure. S5). The Q and S values obtained from the timeline analysis were 0.5723 and 0.8384, respectively, indicating a high level of credibility and reference value. The timeline analysis reveals that research on target range contaminated site remediation emerged in the early 21st century. Moreover, the timeline graph effectively illustrates the evolution of research frontier topics in this field since 2001. In the field of range contaminated site remediation, the research areas of "phytoremediation", "microbial remediation", and "microbial migration" have gained significant popularity.

# Supplementary Figures


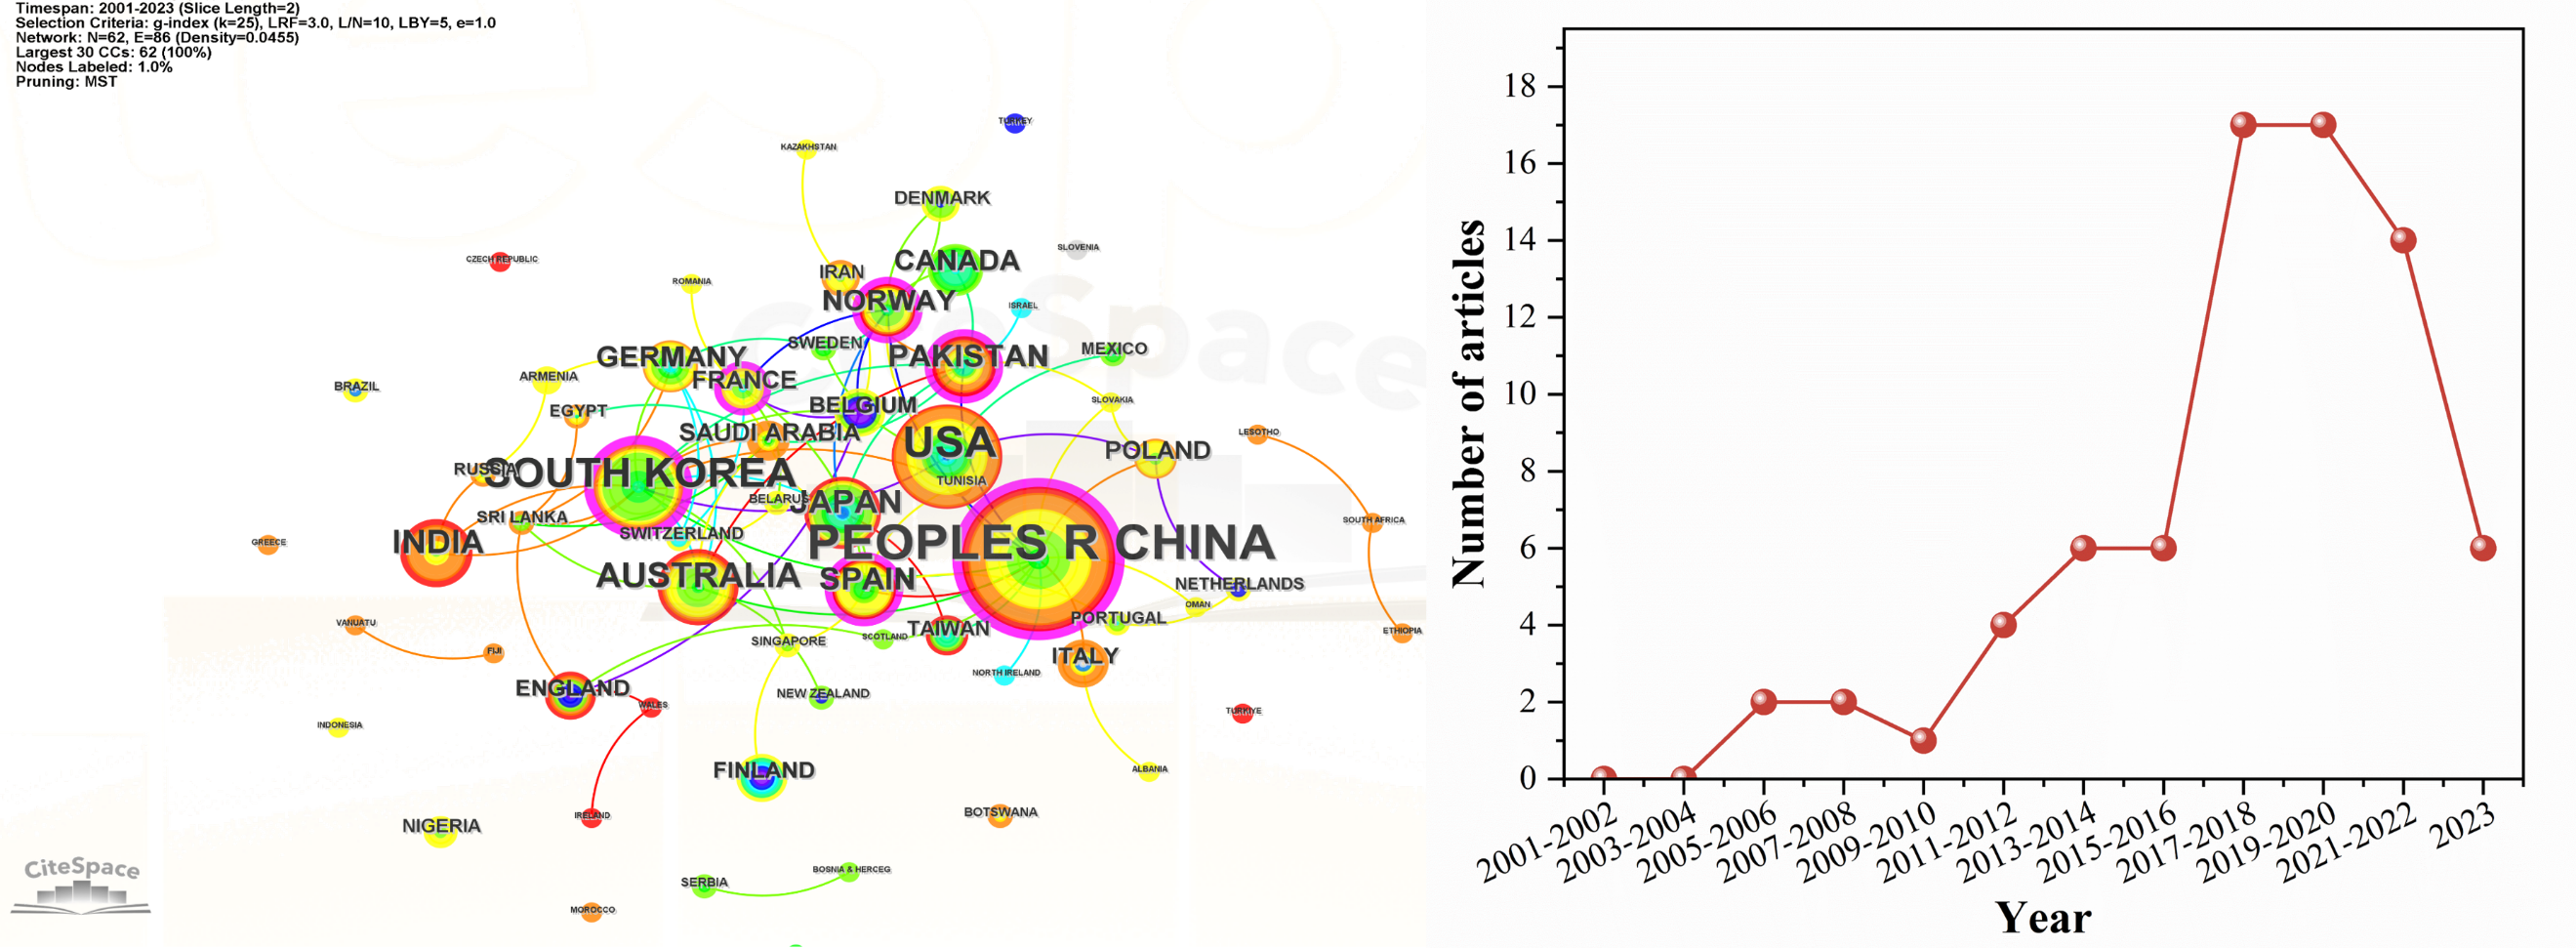


**Supplementary Figure 1.** (a) Mapping of Countries with Publications in the Field of Remediation of Contaminated Sites at Target Ranges, 2001-2023 (b) Trend of Publications in China in the Field of Remediation of Contaminated Sites at Target Ranges Over the Years


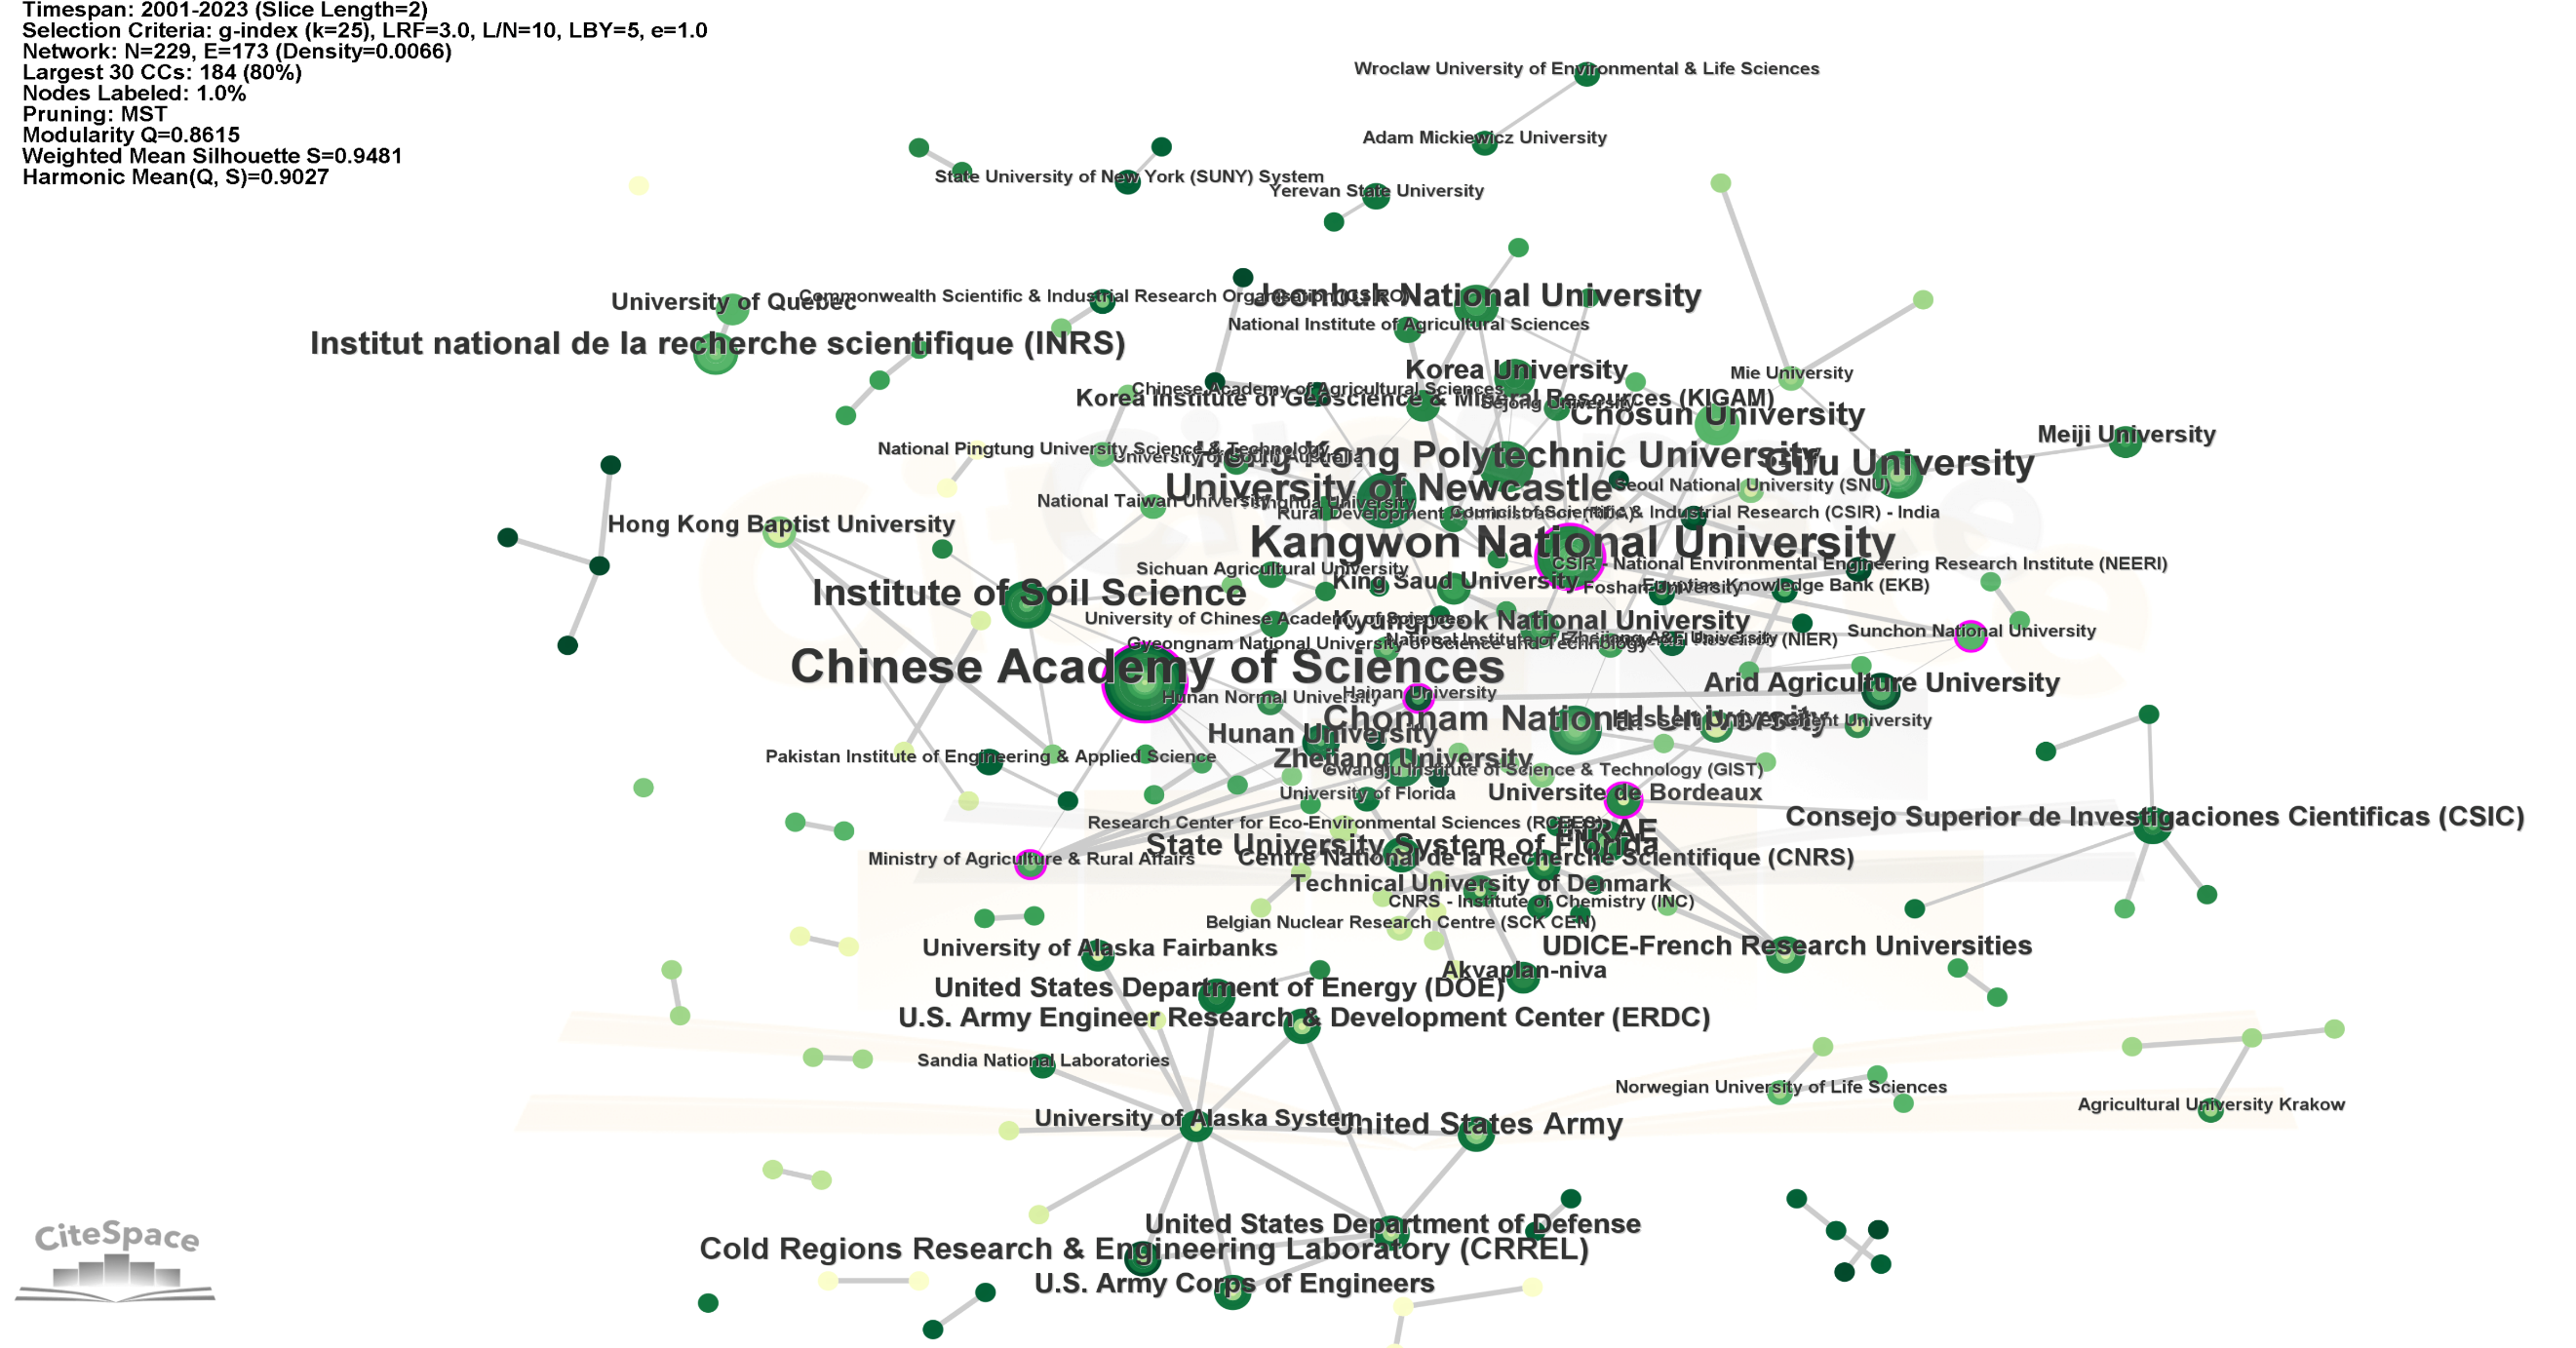


**Supplementary Figure 2.** Mapping of Institutions Issuing Papers in the Field Related to Remediation of Contaminated Sites at Target Ranges, 2001-2023


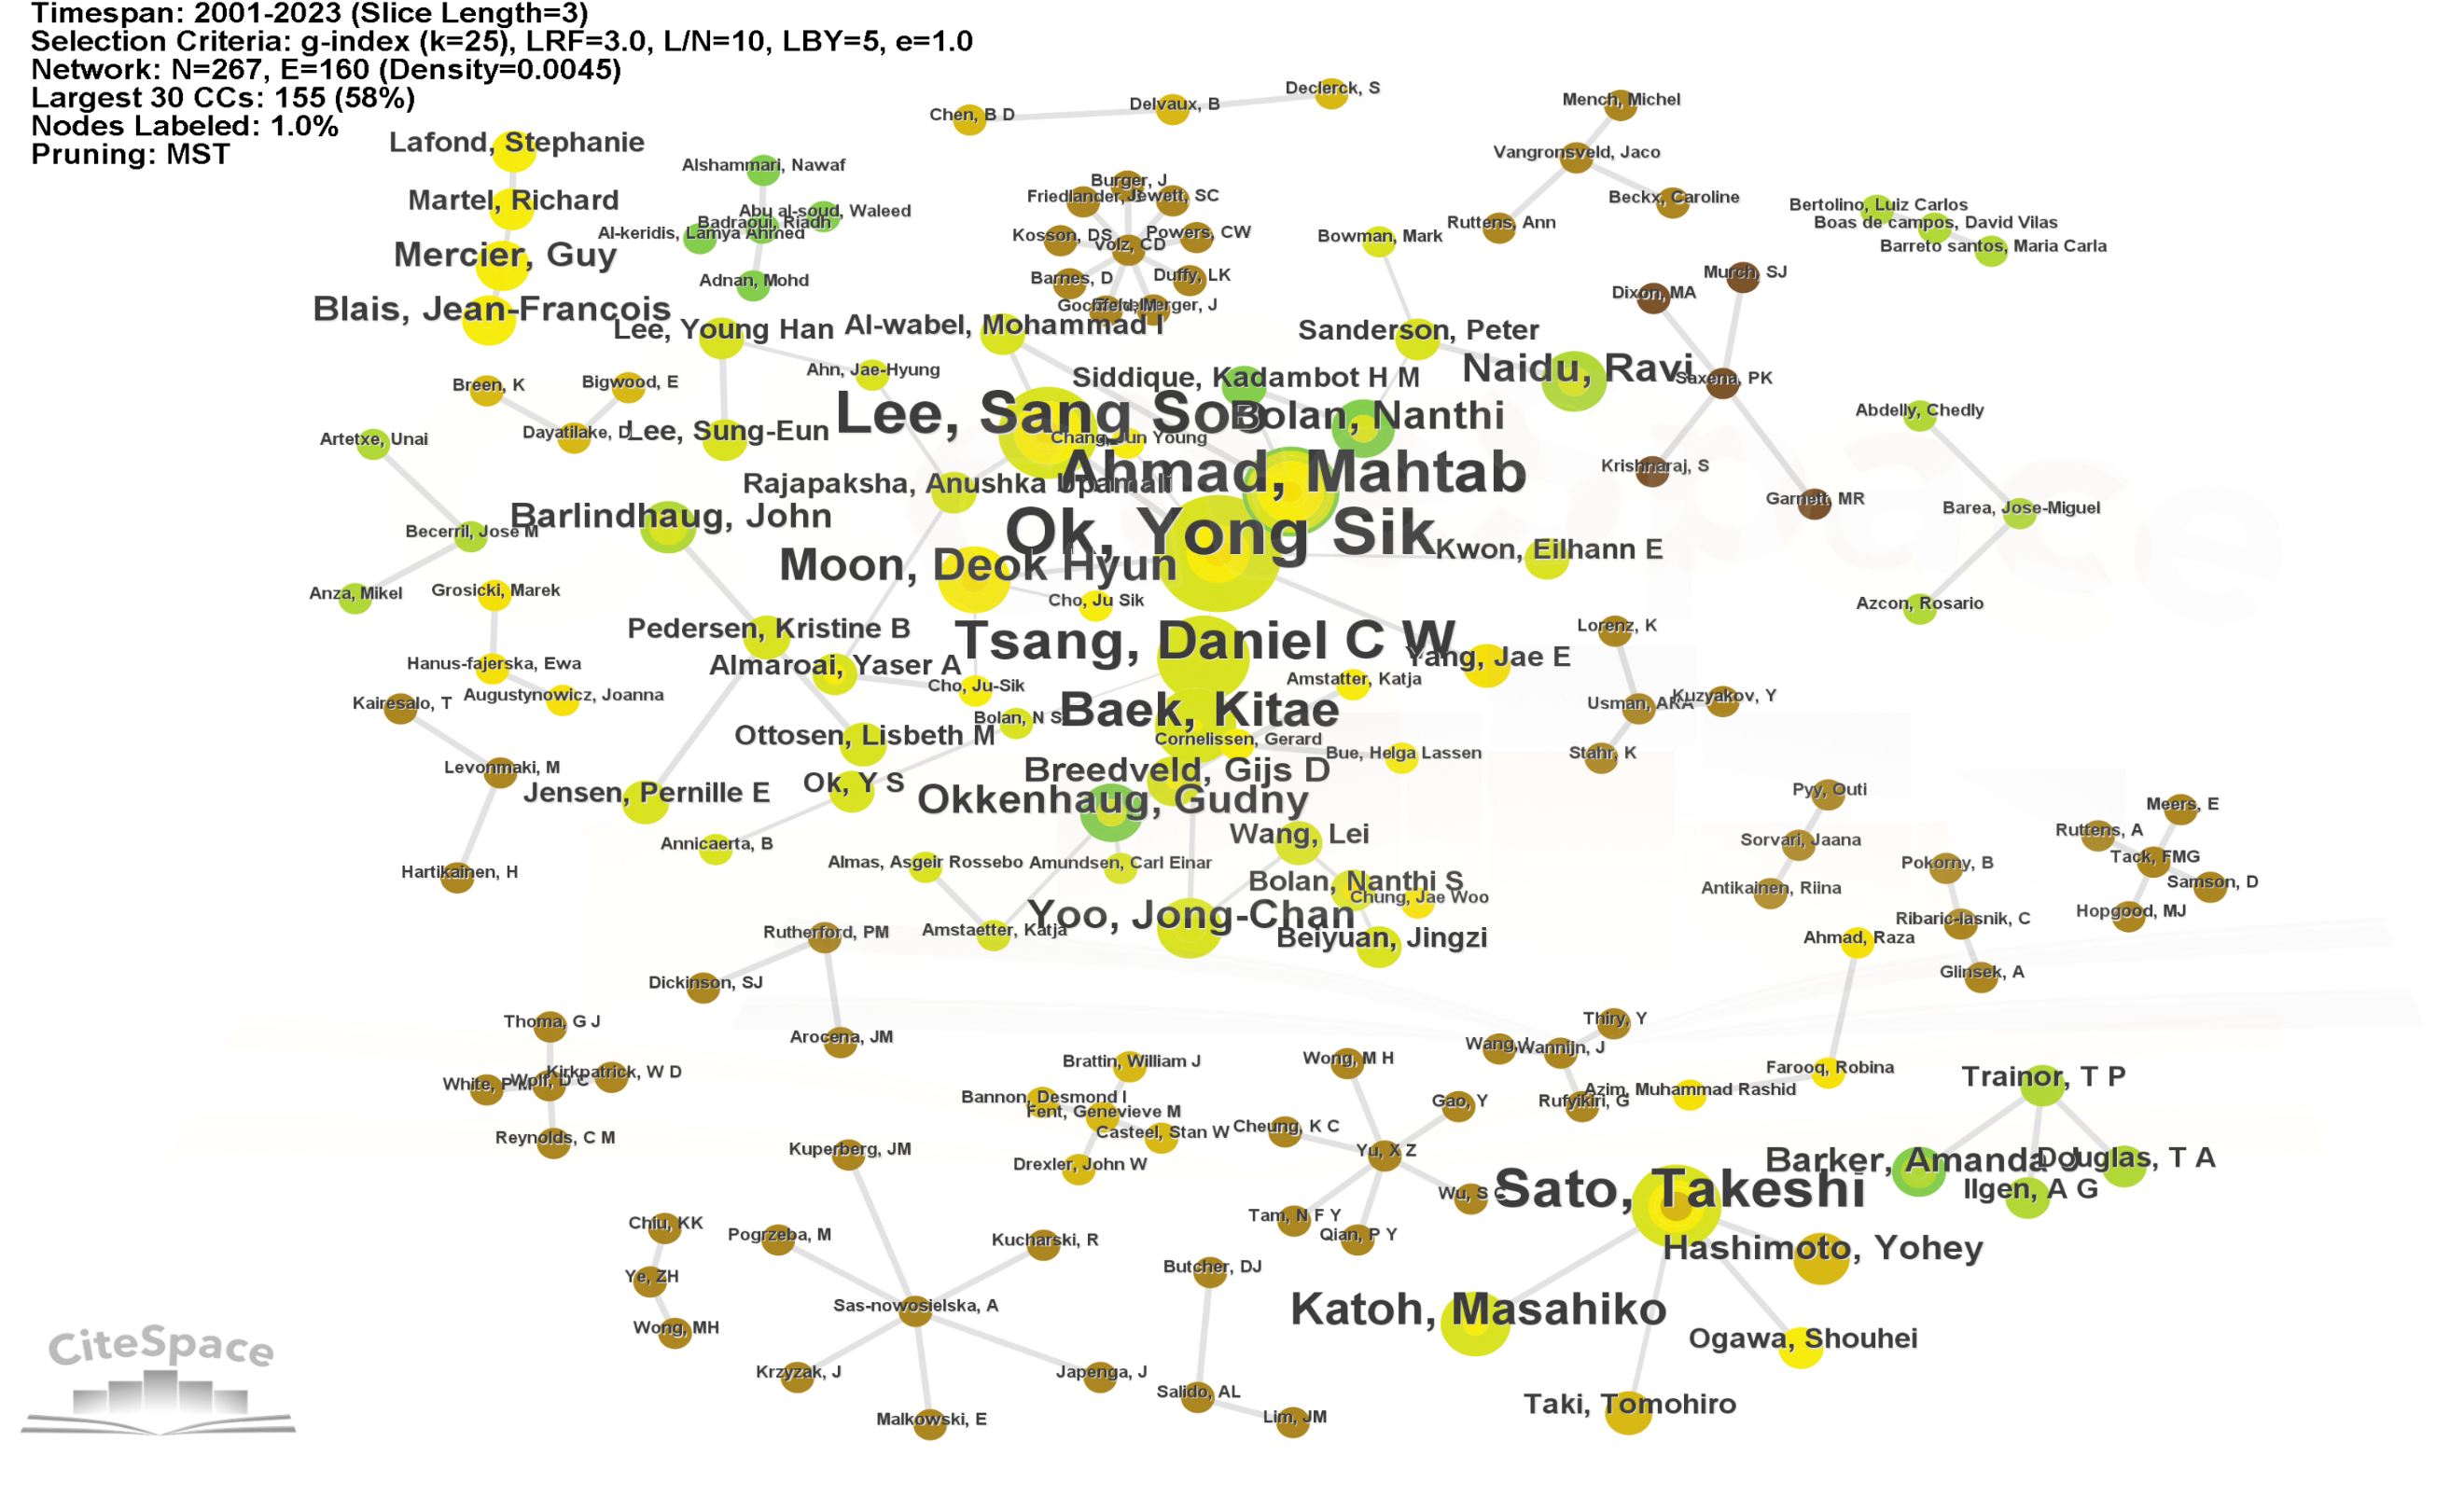


**Supplementary Figure 3.** Author mapping of publications in fields related to remediation of contaminated sites at ranges, 2001-2023


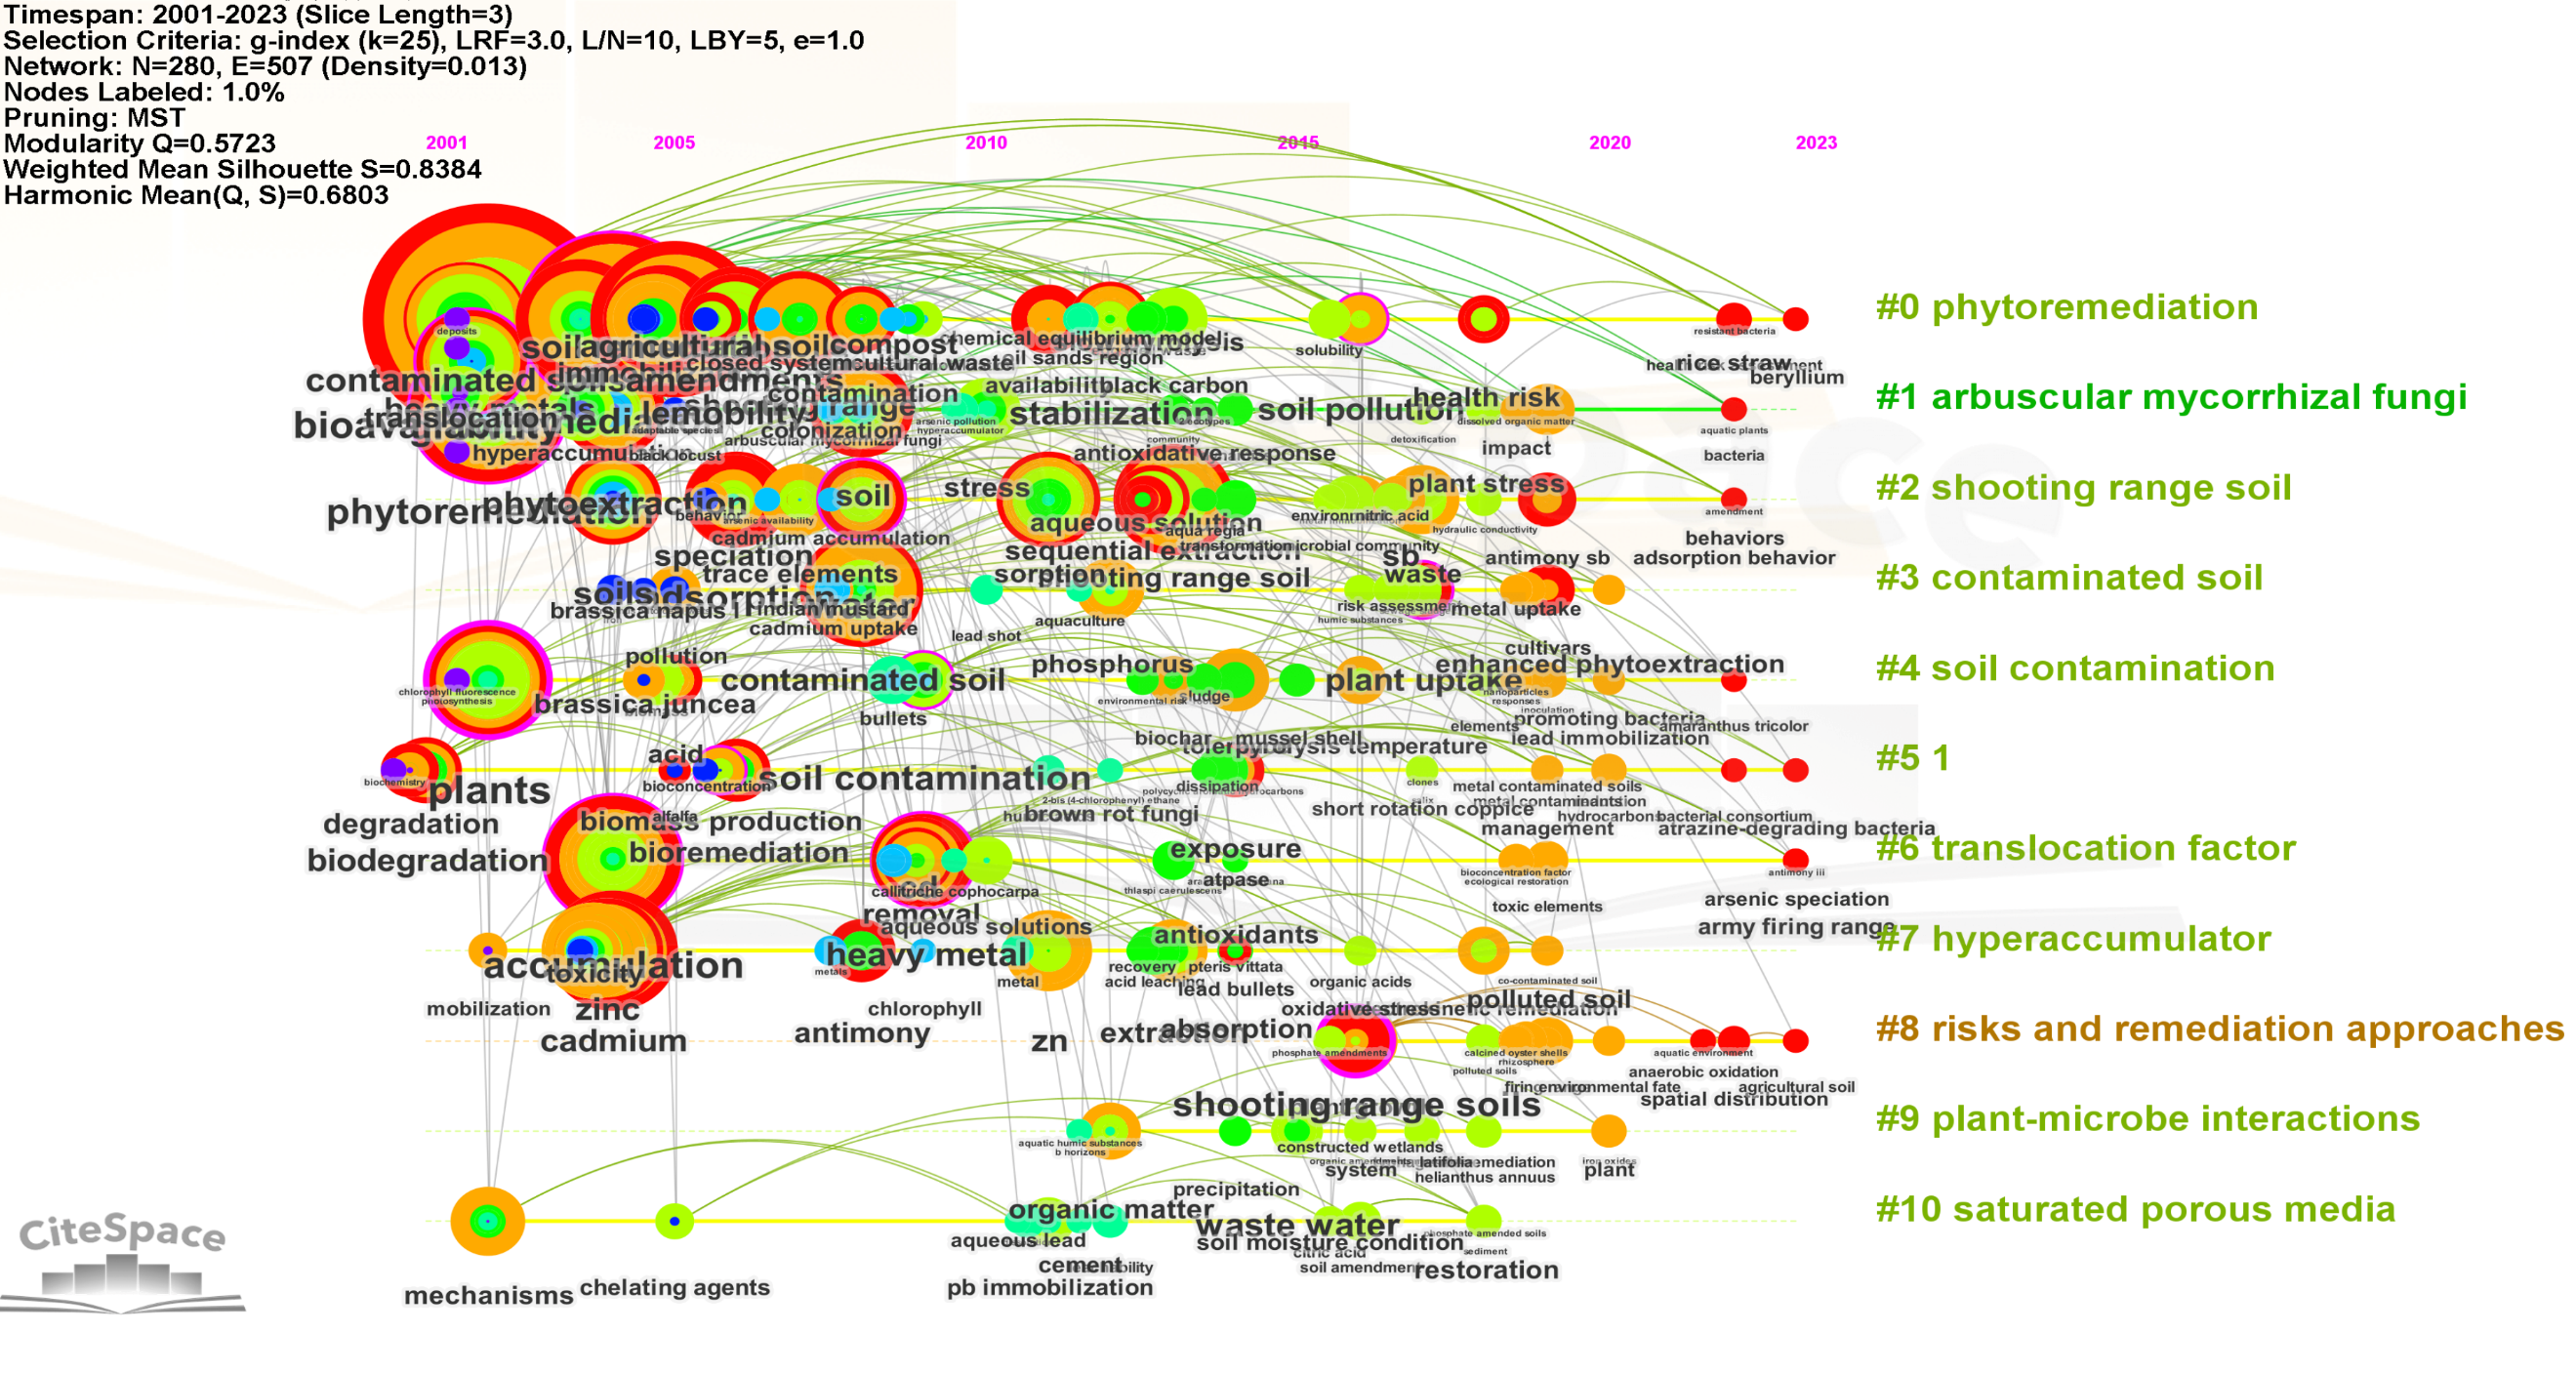


**Supplementary Figure 4.** Keyword clustering time line graph of literature related to the remediation of contaminated sites at the range, 2001-2023

# Supplementary Tables

**Supplementary Table 1** Top five countries and regions with the highest number of publications in fields related to contamination remediation of contaminated sites at ranges, 2001-2023

| **Count** | **Centrality** | **Year** | **Country** |
| --- | --- | --- | --- |
| 75 | 0.33 | 2005 | China |
| 44 | 0.07 | 2002 | USA |
| 35 | 0.25 | 2005 | South Korea |
| 19 | 0.07 | 2010 | Australia |
| 18 | 0.04 | 2009 | Japan |

**Supplementary Table 2** Top Five Issuing Organizations with the Largest Number of Published Literature in the Field Related to Pollution Remediation of Contaminated Sites at Target Ranges, 2001-2023

| **Count** | **Centrality** | **Year** | **Institutions** |
| --- | --- | --- | --- |
| 17 | 0.17 | 2008 | Chinese Academy of Sciences |
| 14 | 0.17 | 2012 | Kangwon National University |
| 9 | 0.05 | 2017 | Newcastle University |
| 8 | 0.01 | 2009 | Gifu University |
| 8 | 0.08 | 2016 | The Hong Kong Polytechnic University |

**Supplementary Table 3** A collection of the top five keywords in terms of frequency of occurrence as well as top five keywords in terms of centrality in the literature related to remediation of contaminated sites at firing ranges, 2001-2023

| **Count** | **Centrality** | **Year** | **Keywords** |
| --- | --- | --- | --- |
| 113 | 0.08 | 2002 | heavy metals |
| 76 | 0.12 | 2004 | remediation |
| 50 | 0.10 | 2005 | lead |
| 48 | 0.15 | 2002 | phytoremediation |
| 42 | 0.14 | 2004 | accumulation |
| **Count** | **Centrality** | **Year** | **Keywords** |
| 27 | 0.23 | 2002 | plants |
| 9 | 0.20 | 2016 | shooting range soils |
| 25 | 0.18 | 2002 | growth |
| 48 | 0.15 | 2002 | phytoremediation |
| 42 | 0.14 | 2004 | accumulation |

# Reference

Bannon, D. I., Drexler, J. W., Fent, G. M., Casteel, S. W., Hunter, P. J., Brattin, W. J., et al. (2009). Evaluation of Small Arms Range Soils for Metal Contamination and Lead Bioavailability. *Environ. Sci. Technol.* 43, 9071–9076. doi: 10.1021/es901834h.

Česynaitė, J., Praspaliauskas, M., Pedišius, N., and Sujetovienė, G. (2021). Biological assessment of contaminated shooting range soil using earthworm biomarkers. *Ecotoxicology* 30, 2024–2035. doi: 10.1007/s10646-021-02463-w.

Česynaitė, J., Praspaliauskas, M., and Sujetovienė, G. (2023). Bioaccumulation of trace metal(loid)s and toxic response of Lactuca sativa grown in shooting range soil. *Toxicological & Environmental Chemistry* 105, 28–41. doi: 10.1080/02772248.2023.2199996.

Christou, A., Hadjisterkotis, E., Dalias, P., Demetriou, E., Christofidou, M., Kozakou, S., et al. (2022). Lead contamination of soils, sediments, and vegetation in a shooting range and adjacent terrestrial and aquatic ecosystems: A holistic approach for evaluating potential risks. *Chemosphere* 292, 133424. doi: 10.1016/j.chemosphere.2021.133424.

Dinake, P., Maphane, O., Sebogisi, K., and Kamwi, O. (2018). Pollution status of shooting range soils from Cd, Cu, Mn, Ni and Zn found in ammunition. *Cogent Environmental Science* 4, 1528701. doi: 10.1080/23311843.2018.1528701.

Dinake, P., Mokgosi, S. M., Kelebemang, R., Kereeditse, T. T., and Motswetla, O. (2022). Pollution assessment of antimony in shooting range soils. *South African Journal of Chemistry*, 72–78.

Kelebemang, R., Dinake, P., Sehube, N., Daniel, B., Totolo, O., and Laetsang, M. (2017). Speciation and mobility of lead in shooting range soils. *Chemical Speciation & Bioavailability* 29, 143–152. doi: 10.1080/09542299.2017.1349552.

Knechtenhofer, L. A., Xifra, I. O., Scheinost, A. C., Flühler, H., and Kretzschmar, R. (2003). Fate of heavy metals in a strongly acidic shooting-range soil: small-scale metal distribution and its relation to preferential water flow. *Journal of Plant Nutrition and Soil Science* 166, 84–92. doi: 10.1002/jpln.200390017.

Lafond, S., Blais, J.-F., Mercier, G., and Martel, R. (2014). A Counter-Current Acid Leaching Process for the Remediation of Contaminated Soils from a Small-Arms Shooting Range. *Soil and Sediment Contamination: An International Journal* 23, 194–210. doi: 10.1080/15320383.2014.808171.

Laporte‐Saumure, M., Martel, R., and Mercier, G. (2011). Characterization and metal availability of copper, lead, antimony and zinc contamination at four Canadian small arms firing ranges. *Environmental Technology* 32, 767–781. doi: 10.1080/09593330.2010.512298.

Lee, J.-H., and Park, K.-S. (2008). Heavy Metal Distribution in Soils from the Maehyang-ri Inland Shooting Range Area. 24, 407–414.

Mariussen, E., Johnsen, I. V., and Strømseng, A. E. (2017). Distribution and mobility of lead (Pb), copper (Cu), zinc (Zn), and antimony (Sb) from ammunition residues on shooting ranges for small arms located on mires. *Environ Sci Pollut Res* 24, 10182–10196. doi: 10.1007/s11356-017-8647-8.

Moon, I., Kim, H., Jeong, S., Choi, H., Park, J., and Lee, I. (2021). Chemical Properties of Heavy Metal-Contaminated Soils from a Korean Military Shooting Range: Evaluation of Pb Sources Using Pb Isotope Ratios. *Applied Sciences* 11, 7099. doi: 10.3390/app11157099.

Okkenhaug, G., Smebye, A. B., Pabst, T., Amundsen, C. E., Sævarsson, H., and Breedveld, G. D. (2018). Shooting range contamination: mobility and transport of lead (Pb), copper (Cu) and antimony (Sb) in contaminated peatland. *J Soils Sediments* 18, 3310–3323. doi: 10.1007/s11368-017-1739-8.

Rodríguez-Seijo, A., Alfaya, M. C., Andrade, M. L., and Vega, F. A. (2016). Copper, Chromium, Nickel, Lead and Zinc Levels and Pollution Degree in Firing Range Soils. *Land Degradation & Development* 27, 1721–1730. doi: 10.1002/ldr.2497.

Sanderson, P., Naidu, R., Bolan, N., Bowman, M., and Mclure, S. (2012). Effect of soil type on distribution and bioaccessibility of metal contaminants in shooting range soils. *Science of The Total Environment* 438, 452–462. doi: 10.1016/j.scitotenv.2012.08.014.

Sorvari, J. (2007). Environmental Risks at Finnish Shooting Ranges—A Case Study. *Human and Ecological Risk Assessment: An International Journal* 13, 1111–1146. doi: 10.1080/10807030701506124.

Sujetoviene, G., and Cesynaite, J. (2020). Changes in physicochemical properties and contamination with lead in outdoor shooting range soils. *Environ. Eng. Manag. J.* 19, 1025–1031. doi: 10.30638/eemj.2020.097.

Wang, L., Li, H., Li, A., and Deng, J. (2022). Study on characteristics and ecological risks of heavy metal pollution in soil of projectile range in military training ground - A case of a training ground in Tibet. *Environmental Chemistry*, 2646–2654.
